# Supplementary material for: Quantification of T4-Like and T7-Like Cyanophages Using the Polony Method Show They Are Significant Members of the Virioplankton in the North Pacific Subtropical Gyre
Source: PubMed Central journal article supplement (PMC7308941; doi:10.3389/fmicb.2020.01210), 2020-06-16
Supplement: Table_1.pdf [file Table_1.pdf]

**Supplementary Table 1:** T4-like phages and environmental sequences used in phylogenetic analysis and primer design, and representatives of those used for probe design, with their *g20* nucleotide NCBI accession numbers.

|                            | <b>g20 sequence</b>         | <b>Accession number</b> | <b>Usage</b>                  |
|----------------------------|-----------------------------|-------------------------|-------------------------------|
| <b>T4-like cyanophages</b> | P-SSM4 *                    | AY940168                | g20 primers and probes design |
|                            | Syn19 *                     | GU071106                |                               |
|                            | S-SM1 *                     | GU071094                |                               |
|                            | S-SSM5                      | GU071097                |                               |
|                            | P-RSM4 *                    | GU071099                |                               |
|                            | Syn33 *                     | GU071108                |                               |
|                            | P-SSM7                      | GU071103                |                               |
|                            | Syn9 *                      | DQ149023                |                               |
|                            | S-ShM2                      | GU071096                |                               |
|                            | P-TIM40 *                   | KP211958                |                               |
|                            | S-PM2 *                     | AF363675                |                               |
|                            | Syn1                        | GU071105                |                               |
|                            | S-RSM4 *                    | FM207411                |                               |
|                            | P-SSM2                      | AY939844                |                               |
|                            | S-SM2 *                     | GU071095                |                               |
|                            | S-SSM7 *                    | GU071098                |                               |
|                            | P-HM1 *                     | GU071101                |                               |
|                            | P-HM2 *                     | GU075905                |                               |
|                            | P79                         | AY027983                |                               |
|                            | S-WHM1                      | AF016385                |                               |
|                            | S-LKM3 *                    | MN701563                |                               |
|                            | P-TIM68 *                   | KM359505                |                               |
|                            | S-BnM1                      | AF016386                |                               |
|                            | S-CAM4 isolate 0809SB33     | KU686201                |                               |
|                            | S-RIM50                     | KU594605                |                               |
|                            | S-RIM8 isolate RW_06_0613   | KX349287                |                               |
|                            | S-RIM32 isolate RW_108_0702 | KU594606                |                               |
|                            | S-CAM22 isolate 1209TA19    | KU686209                |                               |
|                            | S-MbCM7                     | KF156338                |                               |
|                            | S-IOM18                     | HQ317383                |                               |
|                            | S-MbCM100                   | KF156340                |                               |
|                            | S-TIM4 *                    | MH512890                |                               |
|                            | S-WAM2 isolate 0810PA29     | KU686211                |                               |
| S-WAM1 isolate 0810PA09    | KU686210                    |                         |                               |
| S-RIM44 isolate W2_07_0710 | KU594607                    |                         |                               |
| S-SKS1                     | HQ633071                    |                         |                               |
| Syn2 *                     | EU715809                    | g20 probes design       |                               |
| P-RSM1 *                   | HQ634175                    |                         |                               |
| S-SSM2 *                   | AGH57437                    |                         |                               |
| S-SSM1 *                   | EU715790                    |                         |                               |

\* sequences used in phylogenetic analysis shown in Figure 1

|                                                  | <b>g20 sequence</b> | <b>Accession number</b> | <b>Usage</b>      |
|--------------------------------------------------|---------------------|-------------------------|-------------------|
| <b>T4-like cyanophages</b>                       | P-TIM3 *            | JF837215                | g20 probes design |
|                                                  | P-SSM9 *            | EU715799                |                   |
|                                                  | P-SSM12 *           | EU715802                |                   |
|                                                  | P-SSM11 *           | EU715801                |                   |
|                                                  | S-RIM6 *            | AY259249                |                   |
|                                                  | P-SSM10 *           | EU715800                |                   |
|                                                  | S-RIM10 *           | AY259253                |                   |
|                                                  | S-RIM7 *            | AY259250                |                   |
|                                                  | Syn30 *             | HQ634189                |                   |
|                                                  | P-TIM75 *           | MN701564                |                   |
|                                                  | P-RSM5 *            | EU715798                |                   |
|                                                  | P-SSM3 *            | EU715786                |                   |
|                                                  | P-SSM1 *            | EU715797                |                   |
| <b>Non-cyano T4-like phages</b>                  | T4 *                | AF158101                |                   |
|                                                  | HTVC008M *          | KC465899                |                   |
|                                                  | vB_EcoM_VR7 *       | HM563683                |                   |
|                                                  | RB32 *              | DQ904452                |                   |
|                                                  | RB69 *              | AY303349                |                   |
|                                                  | 133 *               | HM114315                |                   |
|                                                  | Ac42 *              | HM032710                |                   |
|                                                  | 31 *                | AY962392                |                   |
|                                                  | RB43 *              | AY967407                |                   |
|                                                  | KP15 *              | GU295964                |                   |
|                                                  | RB49 *              | AY343333                |                   |
|                                                  | Aeh1 *              | AY266303                |                   |
|                                                  | 65 *                | GU459069                |                   |
|                                                  | nt-1 *              | HQ317393                |                   |
|                                                  | KVP40 *             | AY283928                |                   |
| phiM12 *                                         | KF381361            |                         |                   |
| <b>Non-cyano T4-like environmental sequences</b> | SS4055 *            | AY028031                |                   |
|                                                  | GS2624 *            | AY027945                |                   |
|                                                  | SS4850 *            | AAK31775                |                   |
|                                                  | GS2711 *            | AY027956                |                   |
|                                                  | SS4020 *            | AY028018                |                   |
|                                                  | SS4804 *            | AY028065                |                   |
|                                                  | GS2704 *            | AY027952                |                   |
|                                                  | SE36 *              | AY028010                |                   |
|                                                  | SE2 *               | AY027986                |                   |
|                                                  | 24 *                | MN701577                |                   |
|                                                  | 27 *                | MN701578                |                   |
|                                                  | 23 *                | MN701579                |                   |
|                                                  | 21 *                | MN701580                |                   |
|                                                  | 26 *                | MN701581                |                   |
|                                                  | 32 *                | MN701582                |                   |
|                                                  | 28 *                | MN701583                |                   |
|                                                  | 8 *                 | MN701584                |                   |
| uvDeep-GF2-KM20-C144 *                           | KT997822            |                         |                   |

\* sequences used in phylogenetic analysis shown in Figure 1

|                 | <b>g20 sequence</b> | <b>Accession number</b> | <b>Usage</b>                                             |
|-----------------|---------------------|-------------------------|----------------------------------------------------------|
| <b>Polonies</b> | P38269 *            | MN701566                | Verification of the identity of polonies from this study |
|                 | P1811 *             | MN701567                |                                                          |
|                 | P149 *              | MN701568                |                                                          |
|                 | P41126 *            | MN701569                |                                                          |
|                 | P23153 *            | MN701570                |                                                          |
|                 | P92 *               | MN701571                |                                                          |
|                 | P2815 *             | MN701572                |                                                          |
|                 | P1520 *             | MN701573                |                                                          |
|                 | P24235 *            | MN701574                |                                                          |
|                 | P36266 *            | MN701575                |                                                          |
| P2018 *         | MN701576            |                         |                                                          |

\* sequences used in phylogenetic analysis shown in Figure 1
